# Supplementary material for: Icosahedron kernel defect in Pt1Agx series of bimetallic nanoclusters enhances photocatalytic hydrogen evolution
Source: Royal Society of Chemistry journal article supplement (doi:10.1039/d5sc01735a), 2025-01-01
Supplement: d5sc01735a1.pdf [file d5sc01735a1.pdf]

## Supporting Information

### **Icosahedron-kernel defect in Pt<sub>1</sub>Ag<sub>x</sub> series bimetallic nanoclusters enhances photocatalytic hydrogen evolution**

Dong Tan, <sup>#a</sup> Tengfei Ding, <sup>#a</sup> Kaidong Shen, <sup>#a</sup> Chang Xu,<sup>a</sup> Shan Jin,<sup>b</sup> Daqiao Hu,<sup>\*a</sup> Song Sun<sup>\*a</sup> and Manzhou Zhu<sup>\*a</sup>

<sup>a</sup> Department of Chemistry and Centre for Atomic Engineering of Advanced Materials, Key Laboratory of Structure and Functional Regulation of Hybrid Materials of Ministry of Education, Anhui University, Hefei, Anhui 230601, China.

<sup>b</sup> Institutes of Physical Science and Information Technology, Anhui University, Hefei, Anhui 230601, China.

\*E-mail: hudaqiao@ahu.edu.cn; suns@ustc.edu.cn; zmz@ahu.edu.cn

This Supplementary Information includes:

Supplementary Figures 1-27

Supplementary Tables 1-8

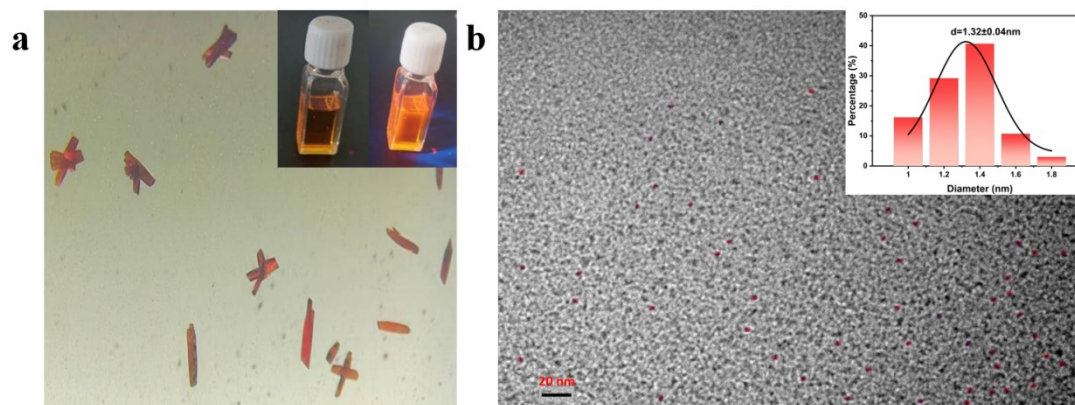

**Supplementary Figure 1.** (a) Crystal images of  $\text{Pt}_1\text{Ag}_{11}$ . Insert of Digital photographs of  $\text{Pt}_1\text{Ag}_{11}$  in  $\text{CH}_2\text{Cl}_2$  under visible and UV lights. (b) Transmission electron microscope (TEM) images of  $\text{Pt}_1\text{Ag}_{11}$ . Insert of (b) the corresponding histogram of  $\text{Pt}_1\text{Ag}_{11}$ .

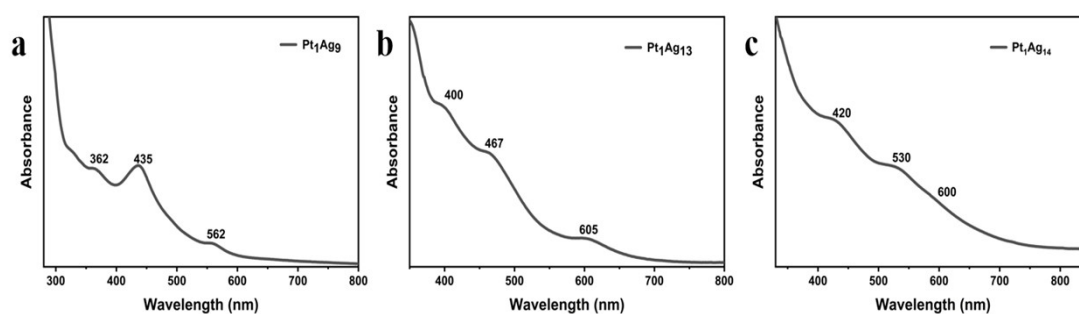

**Supplementary Figure 2.** UV/Vis spectra of  $\text{Pt}_1\text{Ag}_9$  (a);  $\text{Pt}_1\text{Ag}_{13}$  (b); and  $\text{Pt}_1\text{Ag}_{14}$  (c) NCs in  $\text{CH}_2\text{Cl}_2$  at room temperature.

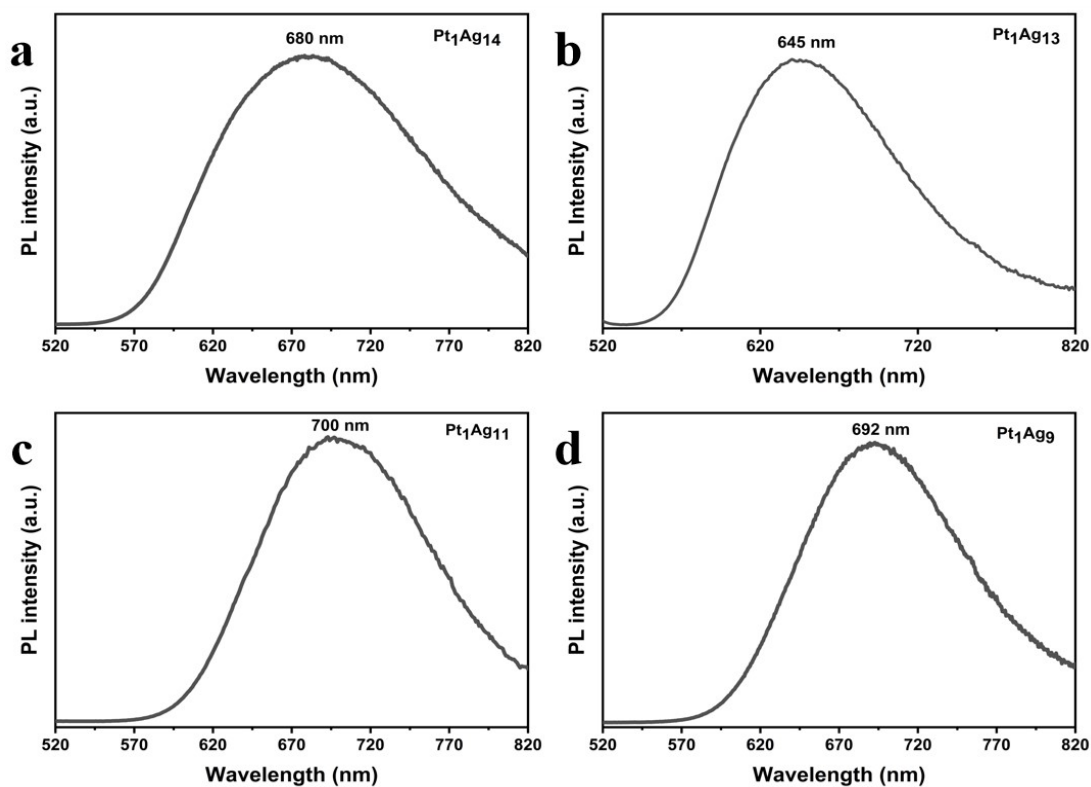

**Supplementary Figure 3.** Emission spectra of Pt<sub>1</sub>Ag<sub>14</sub> (a), Pt<sub>1</sub>Ag<sub>13</sub> (b), Pt<sub>1</sub>Ag<sub>11</sub> (c) and Pt<sub>1</sub>Ag<sub>9</sub> (d)

NCs in the solid state at room temperature.

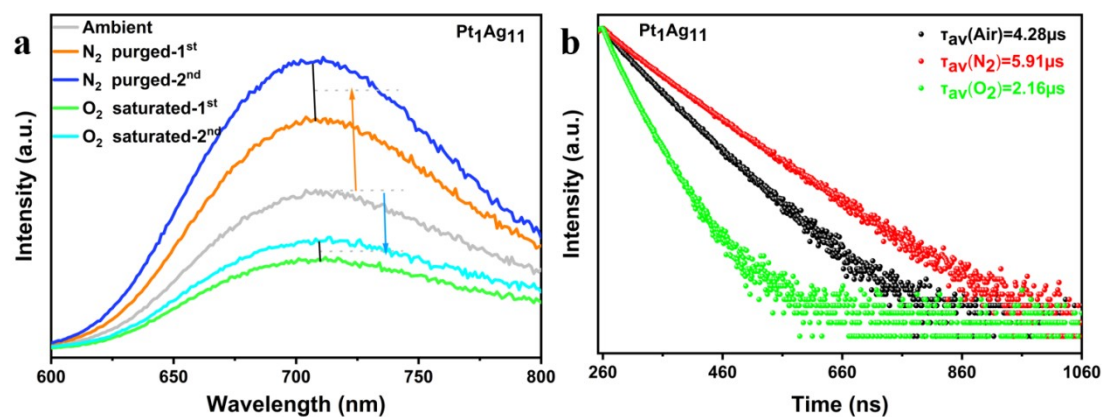

**Supplementary Figure 4.** (a) Comparison of the emission spectra of the Pt<sub>1</sub>Ag<sub>11</sub> under ambient condition (grey line), N<sub>2</sub>-purged (pale red and purple lines), and O<sub>2</sub>-saturated (pale green and pale blue lines) conditions;  $\lambda_{\text{ex}} = 460$  nm. (b) Time-resolved PL decays of the Pt<sub>1</sub>Ag<sub>11</sub> in the solid state.

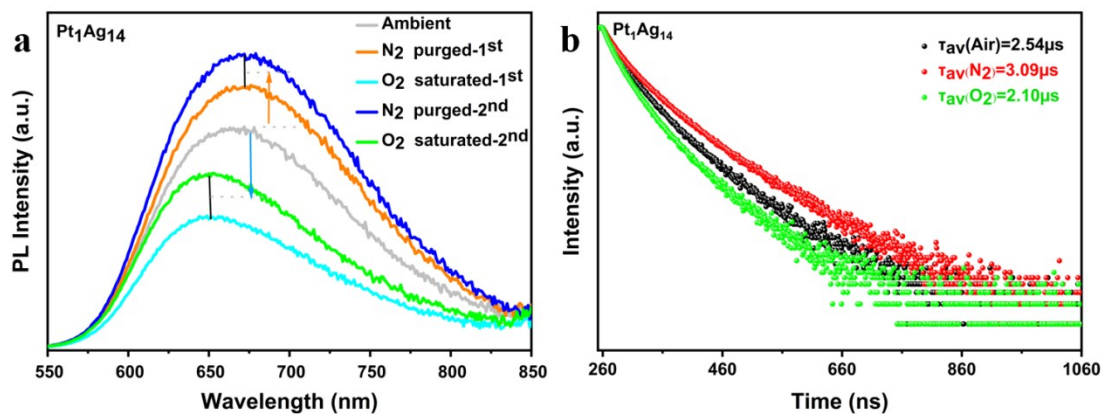

**Supplementary Figure 5.** (a) Comparison of the emission spectra of the Pt<sub>1</sub>Ag<sub>14</sub> under ambient condition (grey line), N<sub>2</sub>-purged (pale red and purple lines), and O<sub>2</sub>-saturated (pale green and pale blue lines) conditions;  $\lambda_{\text{ex}} = 460 \text{ nm}$ . (b) Time-resolved PL decays of the Pt<sub>1</sub>Ag<sub>14</sub> in the solid state.

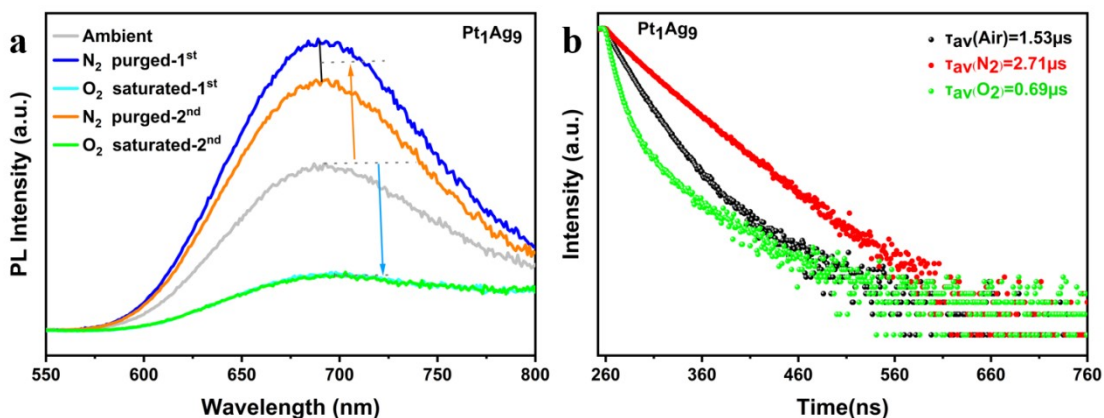

**Supplementary Figure 6.** (a) Comparison of the emission spectra of the Pt<sub>1</sub>Ag<sub>9</sub> under ambient condition (grey line), N<sub>2</sub>-purged (pale red and purple lines), and O<sub>2</sub>-saturated (pale green and pale blue lines) conditions;  $\lambda_{\text{ex}} = 460 \text{ nm}$ . (b) Time-resolved PL decays of the Pt<sub>1</sub>Ag<sub>9</sub> in the solid state.

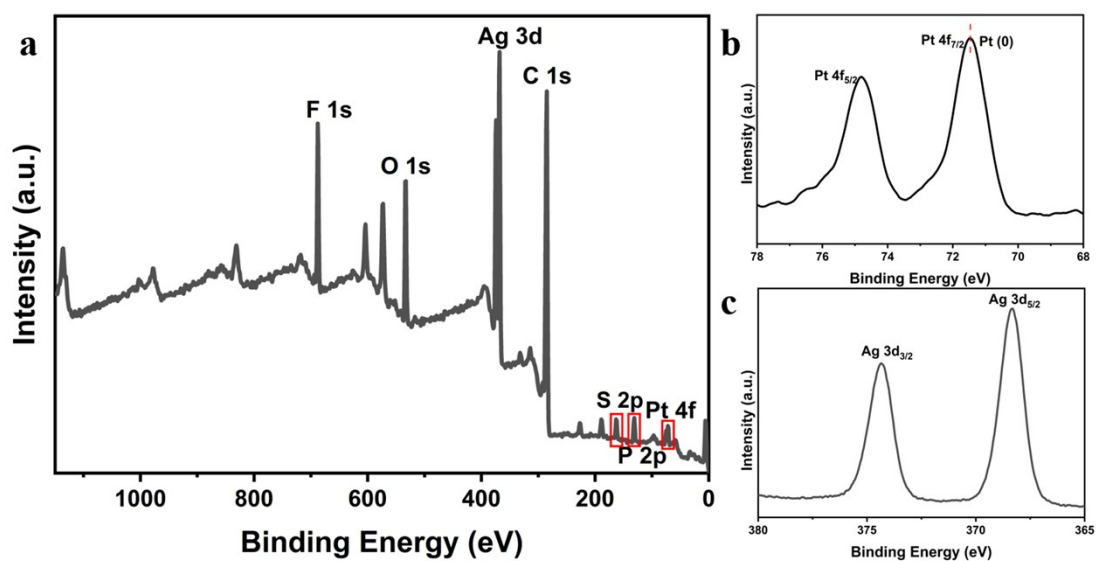

**Supplementary Figure 7.** (a) X-ray photoelectron spectroscopy (XPS) spectrum of the Pt<sub>1</sub>Ag<sub>11</sub>.

XPS of Pt 4f (b), Ag 3d (c) in Pt<sub>1</sub>Ag<sub>11</sub>.

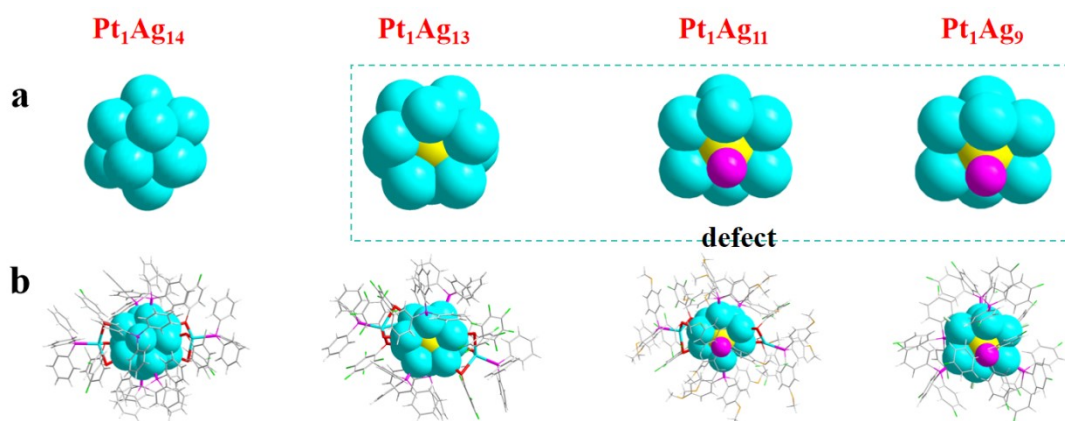

**Supplementary Figure 8.** (a) kernel (b) overall structure. The space-filling model of the Pt<sub>1</sub>Ag<sub>x</sub>

NCs (x = 9, 11, 13, 14).

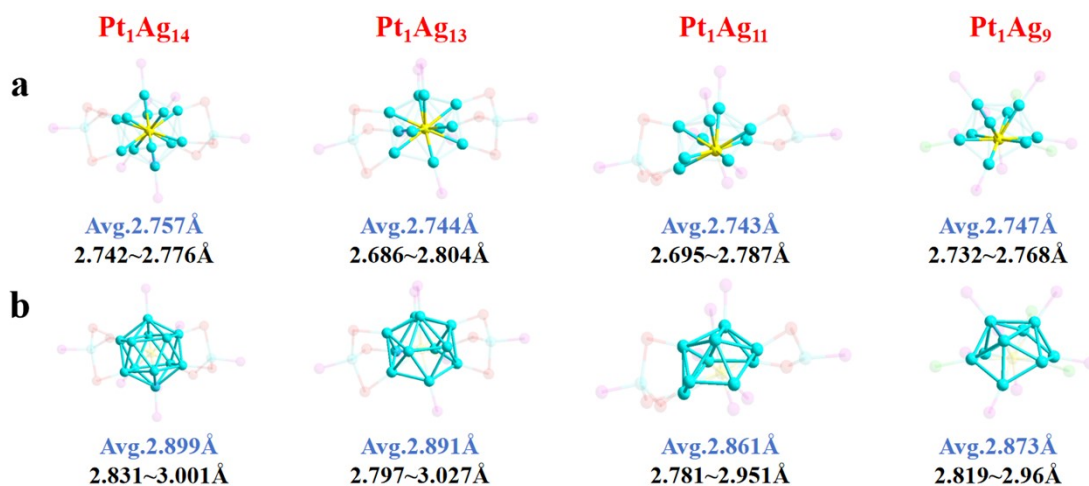

**Supplementary Figure 9.** (a) Comparison of lengths of Pt-Ag. (b) Comparison of the lengths

Ag-Ag. The compared bonds are highlighted.

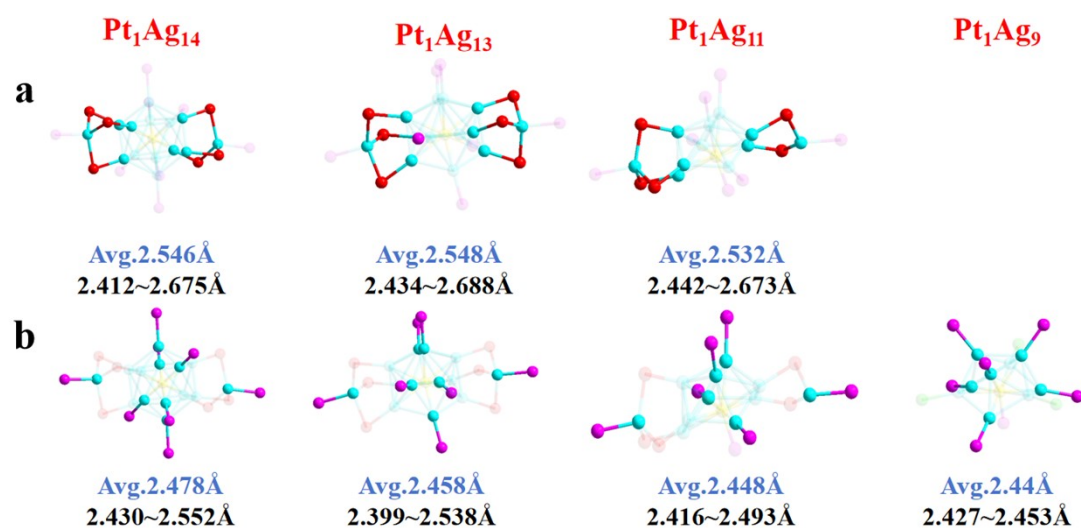

**Supplementary Figure 10.** (a) Comparison of lengths of Ag-S. (b) Comparison of lengths of Ag-

P. The compared bonds are highlighted.



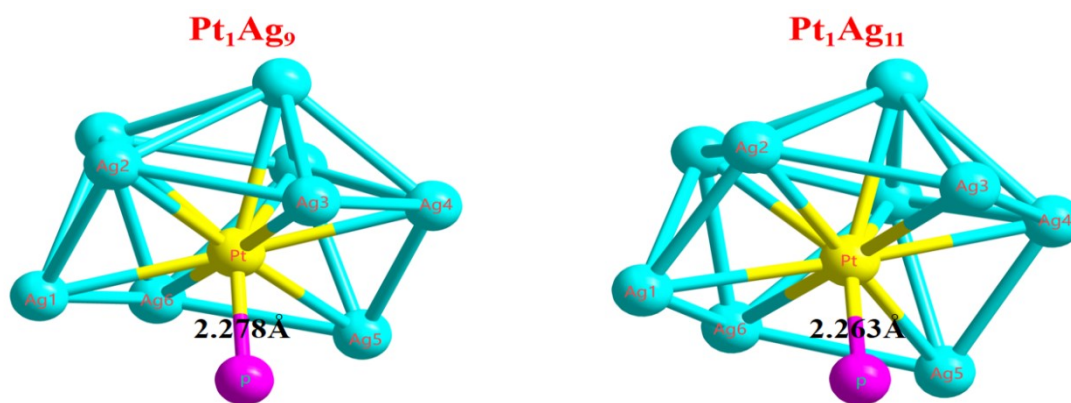

**Supplementary Figure 11.** Comparison of Pt-P bond length of  $\text{Pt}_1\text{Ag}_9$  and  $\text{Pt}_1\text{Ag}_{11}$  NCs.

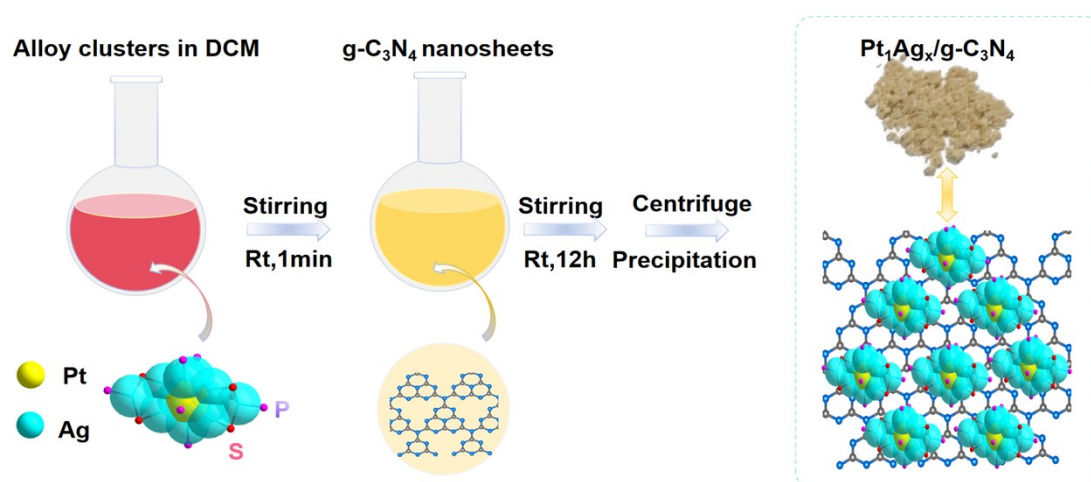

**Scheme S1.** Schematic illustration for the preparation of  $\text{Pt}_1\text{Ag}_x/\text{g-C}_3\text{N}_4$  ( $x = 9, 11, 13, 14$ ).

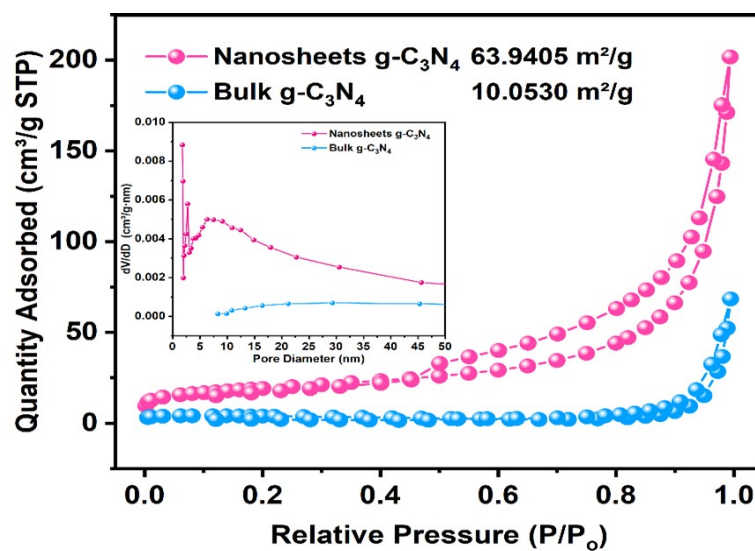

**Supplementary Figure 12.**  $\text{N}_2$  sorption isotherms of bulk and nanosheets g-C<sub>3</sub>N<sub>4</sub> at 125°C, the insert is the corresponding pore size distributions.

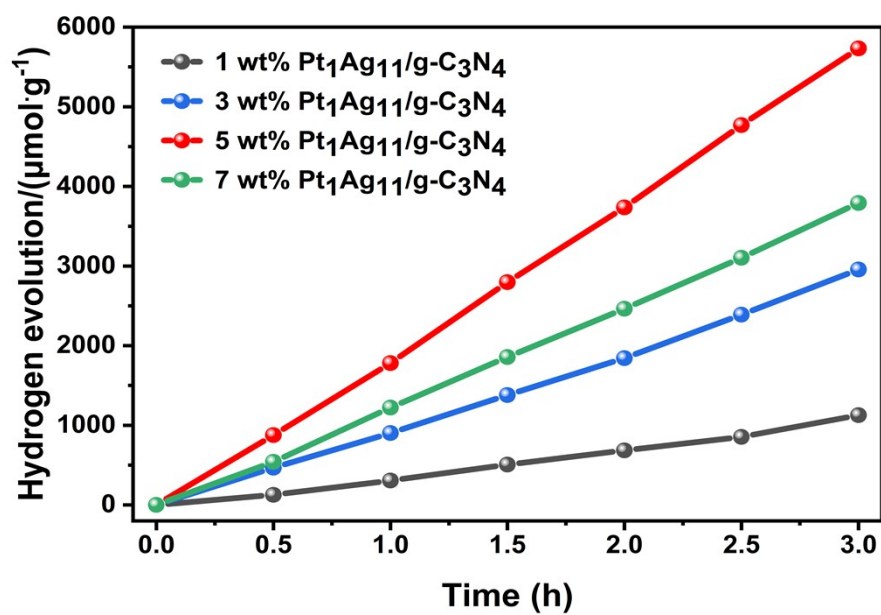

**Supplementary Figure 13.** Photocatalytic H<sub>2</sub> production of the M wt% Pt<sub>1</sub>Ag<sub>11</sub>/g-C<sub>3</sub>N<sub>4</sub> (M=1, 3, 5, and 7mg).

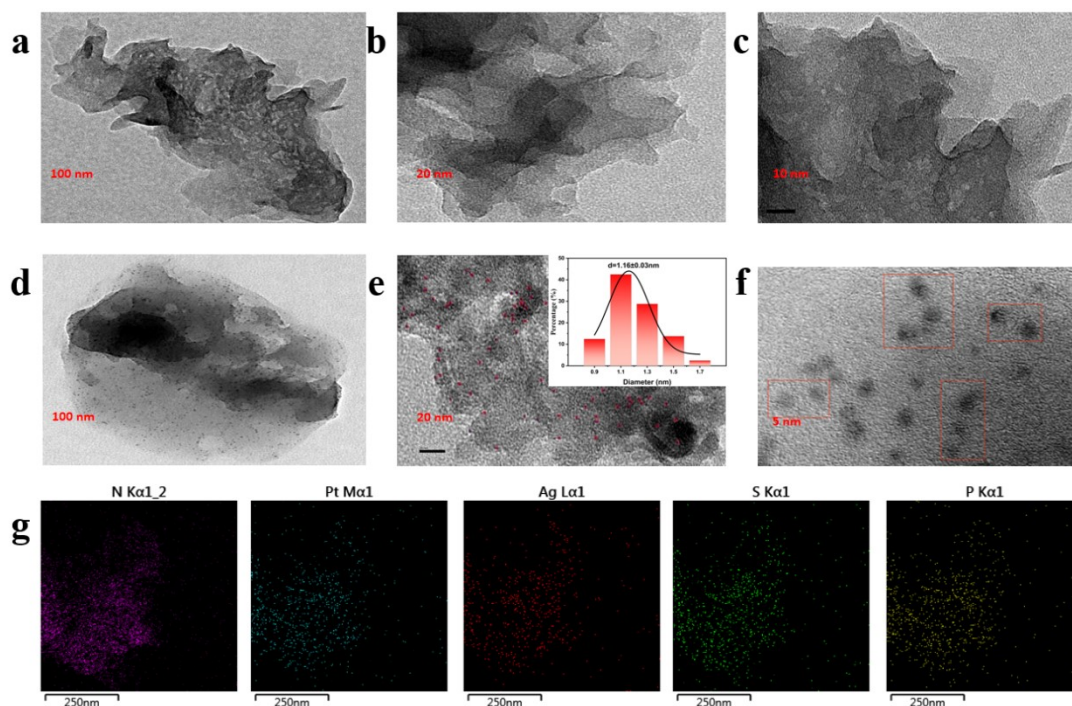

**Supplementary Figure 14.** TEM images of (a-c) synthesized g-C<sub>3</sub>N<sub>4</sub>, (d-f) Pt<sub>1</sub>Ag<sub>11</sub>/g-C<sub>3</sub>N<sub>4</sub> and (g) the corresponding EDX mapping of N, Pt, Ag, S and P elements for Pt<sub>1</sub>Ag<sub>11</sub>/g-C<sub>3</sub>N<sub>4</sub>.



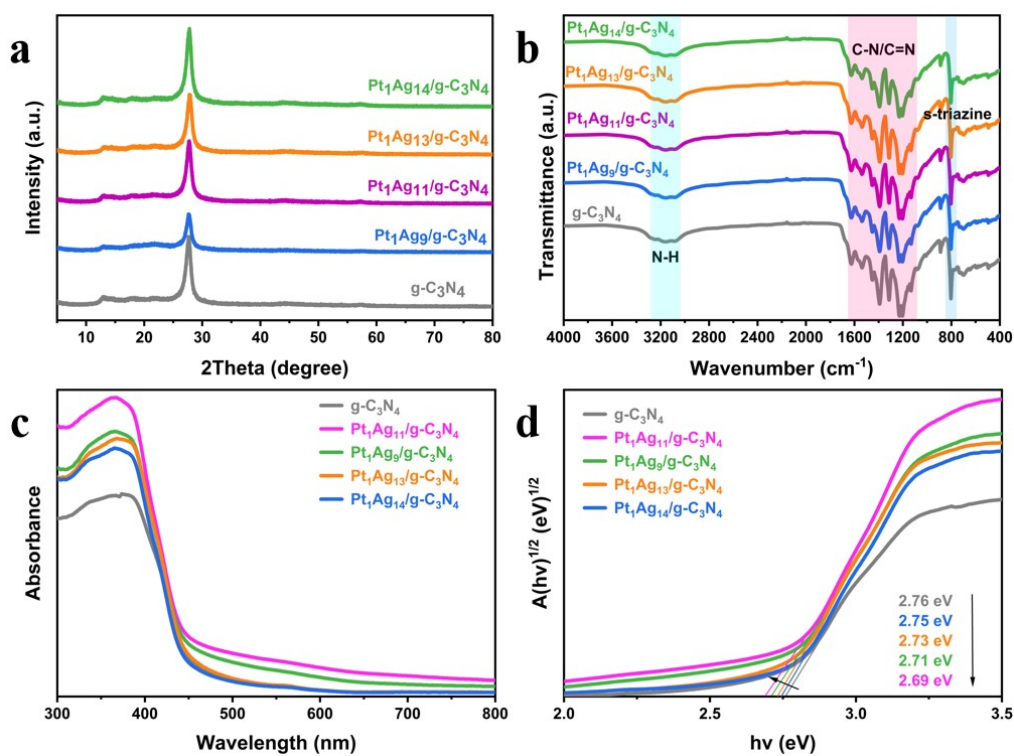

**Supplementary Figure 15.** (a) Powder XRD patterns; (b) FTIR spectra, (c) The UV-vis diffuse reflection spectroscopy (DRS), (d) Tauc plot of synthesized  $g-C_3N_4$  and  $Pt_1Ag_x/g-C_3N_4$  ( $x = 9, 11, 13$  and  $14$ ).

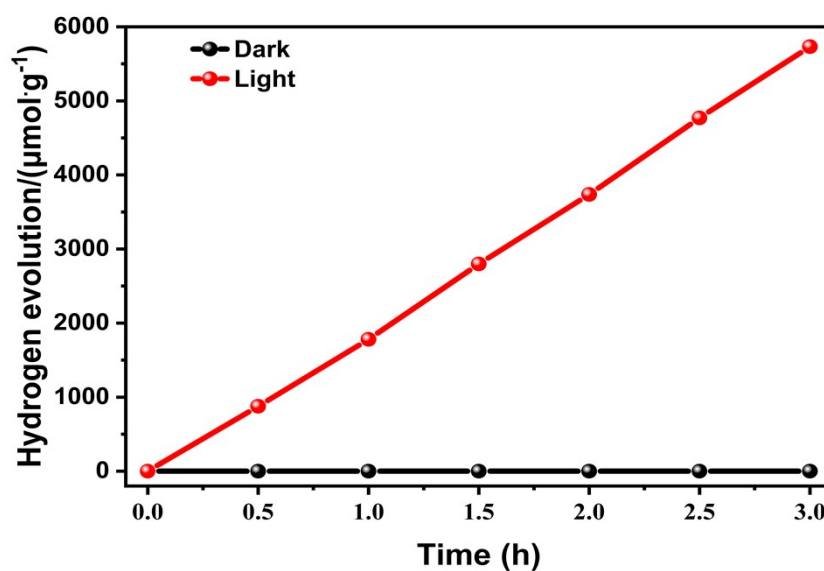

**Supplementary Figure 16.** Photocatalytic  $H_2$  production of  $Pt_1Ag_{11}/g-C_3N_4$  (light on or off).

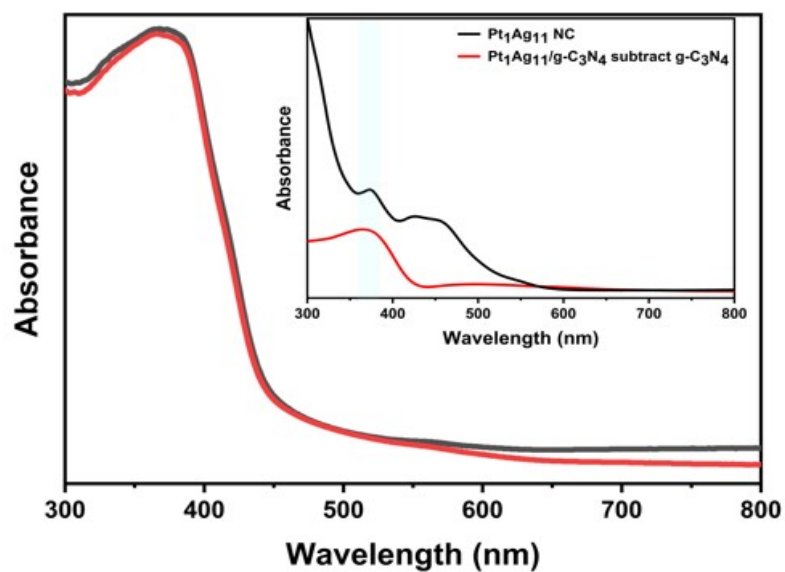

**Supplementary Figure 17.** The UV-vis diffuse reflection spectroscopy of  $\text{Pt}_1\text{Ag}_{11}/\text{g-C}_3\text{N}_4$  before (black line) and after (red line) reactions. (inset: UV-vis spectra of  $\text{Pt}_1\text{Ag}_{11}$  loaded on or encapsulated into  $\text{g-C}_3\text{N}_4$  by subtracting the spectrum of  $\text{g-C}_3\text{N}_4$  from  $\text{Pt}_1\text{Ag}_{11}/\text{g-C}_3\text{N}_4$ .)

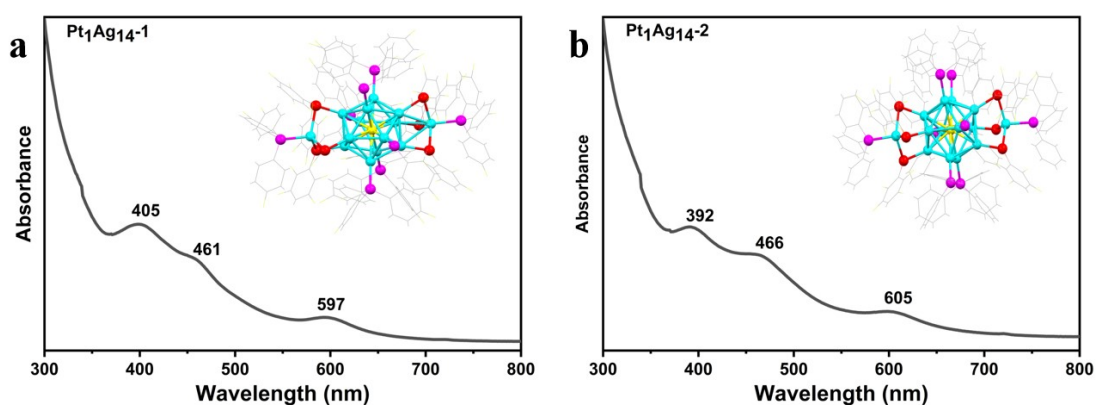

**Supplementary Figure 18.** The UV-vis absorption spectra of (a)  $\text{Pt}_1\text{Ag}_{14-1}$ , (b)  $\text{Pt}_1\text{Ag}_{14-2}$  (inset: overall structure).

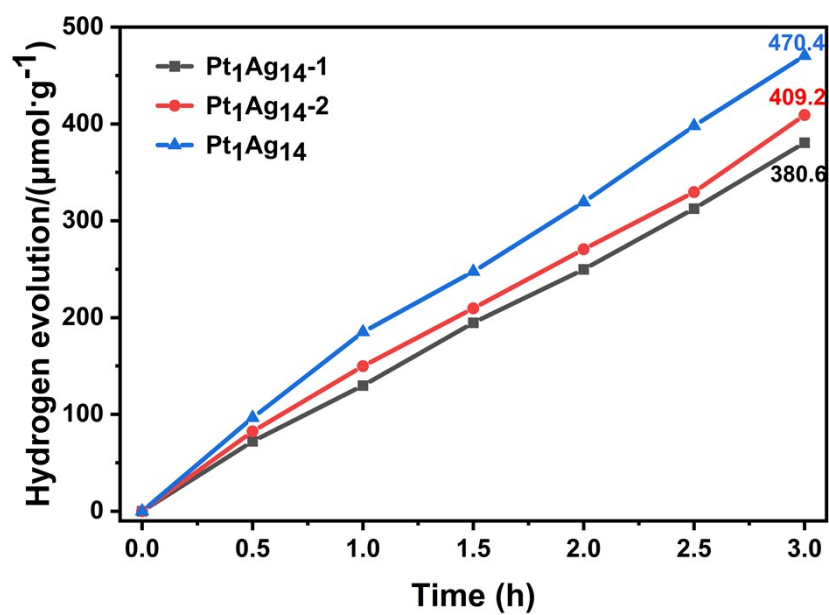

**Supplementary Figure 19.** Photocatalytic H<sub>2</sub> production of **Pt<sub>1</sub>Ag<sub>14</sub>-1/g-C<sub>3</sub>N<sub>4</sub>**, **Pt<sub>1</sub>Ag<sub>14</sub>-2/g-C<sub>3</sub>N<sub>4</sub>** and **Pt<sub>1</sub>Ag<sub>14</sub>/g-C<sub>3</sub>N<sub>4</sub>**.

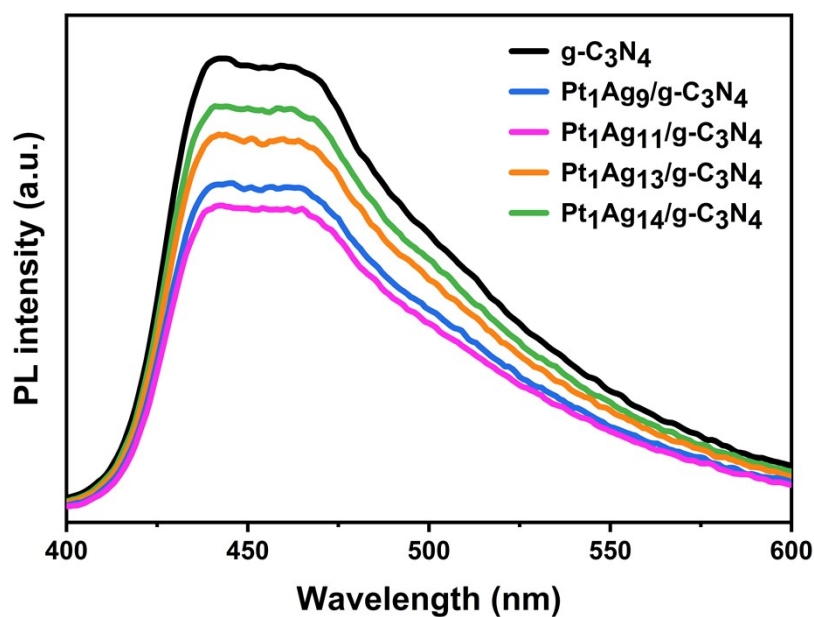

**Supplementary Figure 20.** Photoluminescence spectra of synthesized g-C<sub>3</sub>N<sub>4</sub> and Pt<sub>1</sub>Ag<sub>x</sub>/g-C<sub>3</sub>N<sub>4</sub> (x = 9, 11, 13 and 14).

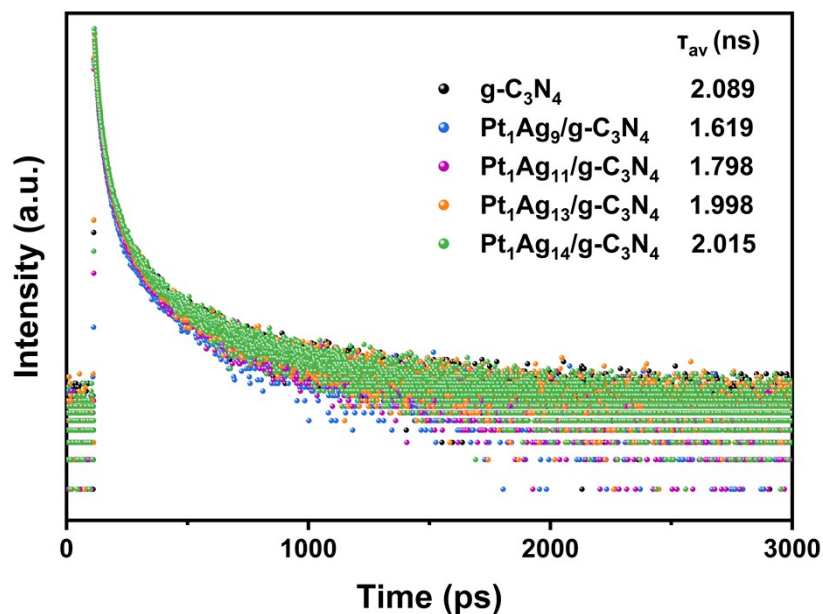

**Supplementary Figure 21.** Time-resolved PL spectra ( $\lambda_{ex} = 373$  nm,  $\lambda_{em} = 460$  nm) of synthesized g-C<sub>3</sub>N<sub>4</sub> and Pt<sub>1</sub>Ag<sub>x</sub>/g-C<sub>3</sub>N<sub>4</sub> (x = 9, 11, 13 and 14).

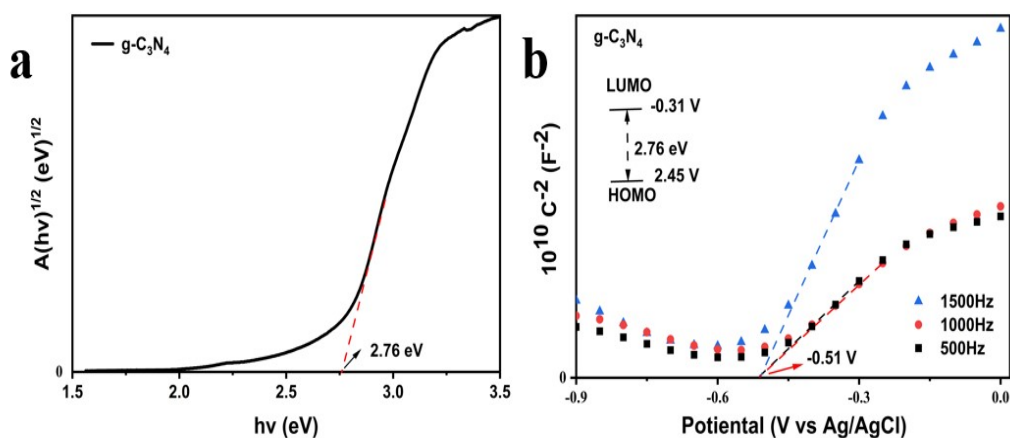

**Supplementary Figure 22.** (a) Tauc plots of g-C<sub>3</sub>N<sub>4</sub>, (b) Mott-Schottky plots of g-C<sub>3</sub>N<sub>4</sub> frequency of 500, 1000, and 1500 Hz, respectively (inset: the energy diagram of g-C<sub>3</sub>N<sub>4</sub>).

The band edge positions of photocatalysis can be calculated using the following equation:

$$E_{CB} = (V \text{ vs. } NHE) = E_{fb} (V \text{ vs. } AgCl/Ag) + 0.197 - X$$

$$E_{VB} = E_{CB} + E_g$$

Where  $E_{VB}$  and  $E_{CB}$  stand for the valence band edge potential and conduction band edge

potential, respectively;  $E_{\text{Ag}/\text{AgCl}} = 0.197 \text{ V}$  (saturated potassium chloride) vs. NHE;  $X$  is the voltage difference between the conduction band value and the flat potential value. In general, the  $E_{fb}$  of an n-type semiconductor is approximately equal to the CB potential ( $E_{CB}$ ).

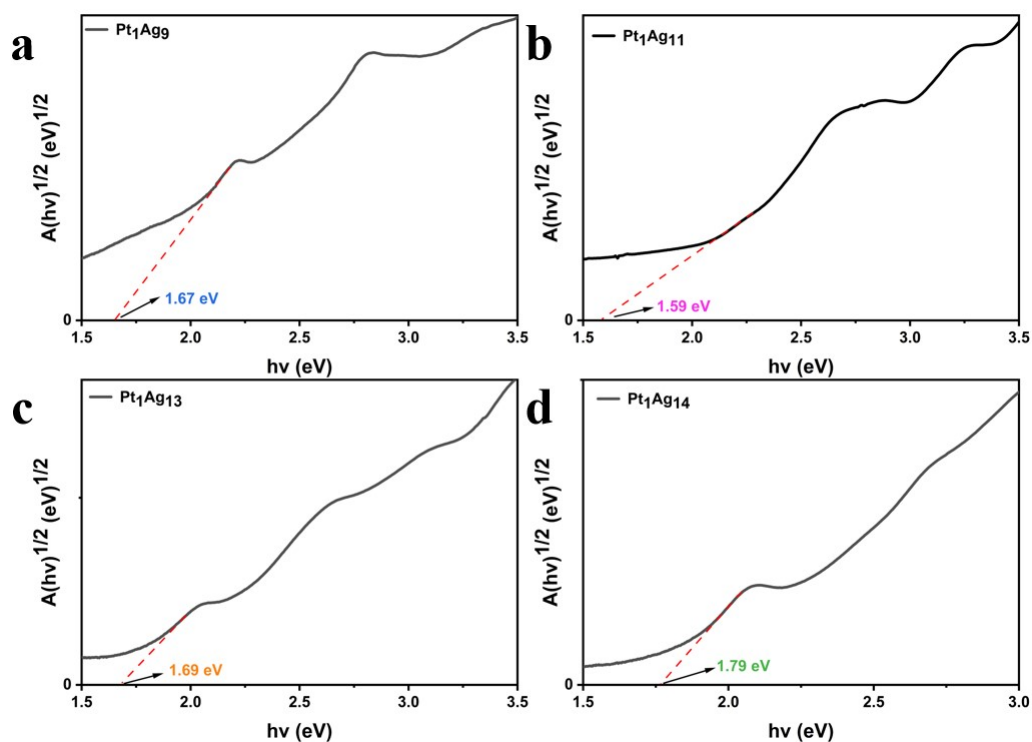

**Supplementary Figure 23.** Tauc plots of (a) Pt<sub>1</sub>Ag<sub>9</sub>, (b) Pt<sub>1</sub>Ag<sub>11</sub>, (c) Pt<sub>1</sub>Ag<sub>13</sub> and (d) Pt<sub>1</sub>Ag<sub>14</sub>.



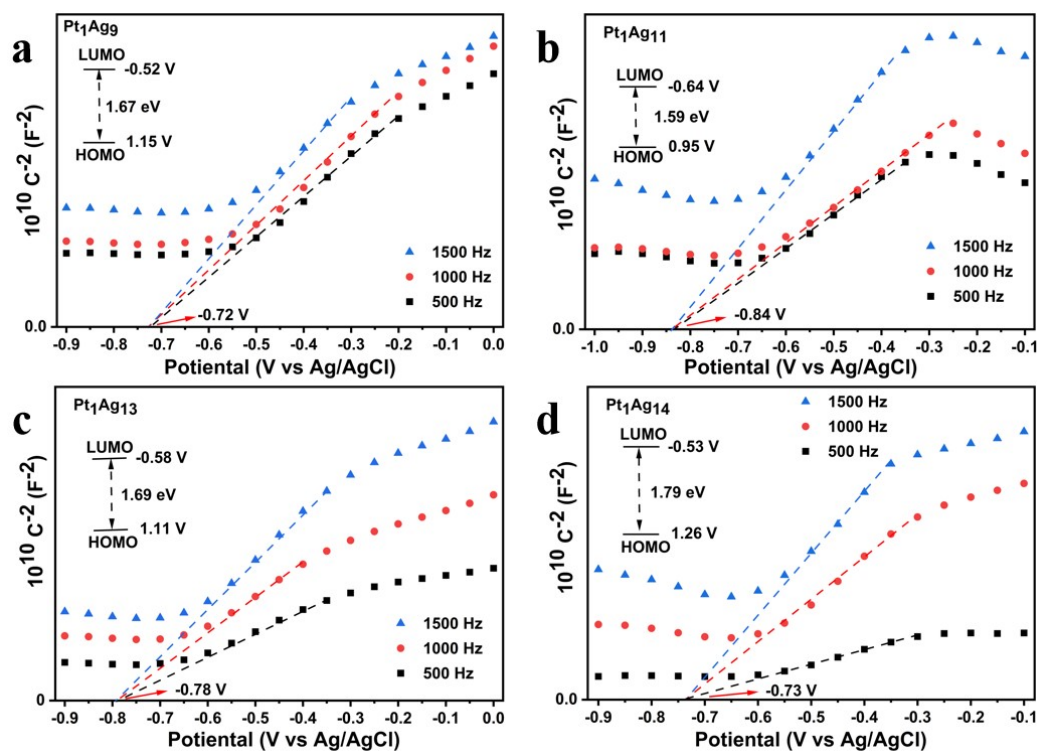

**Supplementary Figure 24.** Mott-Schottky plots of (a)  $\text{Pt}_1\text{Ag}_9$ , (b)  $\text{Pt}_1\text{Ag}_{11}$ , (c)  $\text{Pt}_1\text{Ag}_{13}$  and (d)  $\text{Pt}_1\text{Ag}_{14}$  frequencies of 500, 1000, and 1500 Hz, respectively (inset: the energy diagram of  $\text{Pt}_1\text{Ag}_9$ ,  $\text{Pt}_1\text{Ag}_{11}$ ,  $\text{Pt}_1\text{Ag}_{13}$  and  $\text{Pt}_1\text{Ag}_{14}$  NCs).

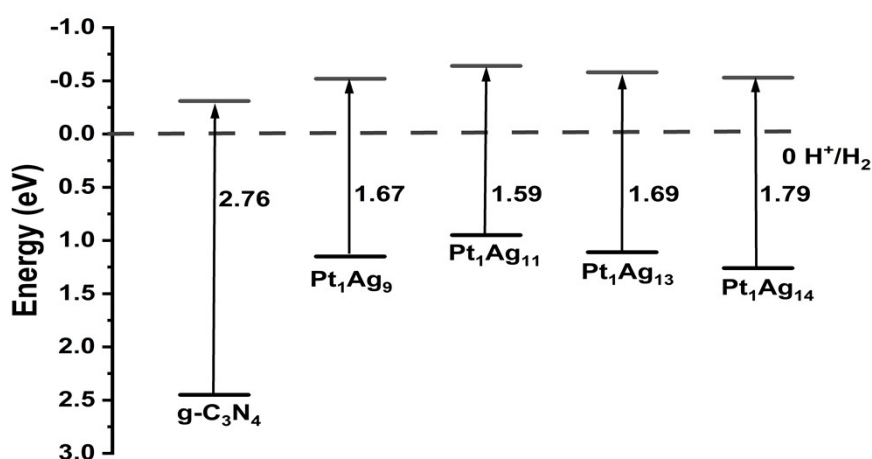

**Supplementary Figure 25.** Energy diagram of  $\text{g-C}_3\text{N}_4$  and  $\text{Pt}_1\text{Ag}_x$  NCs ( $x = 9, 11, 13$ , and  $14$ ).

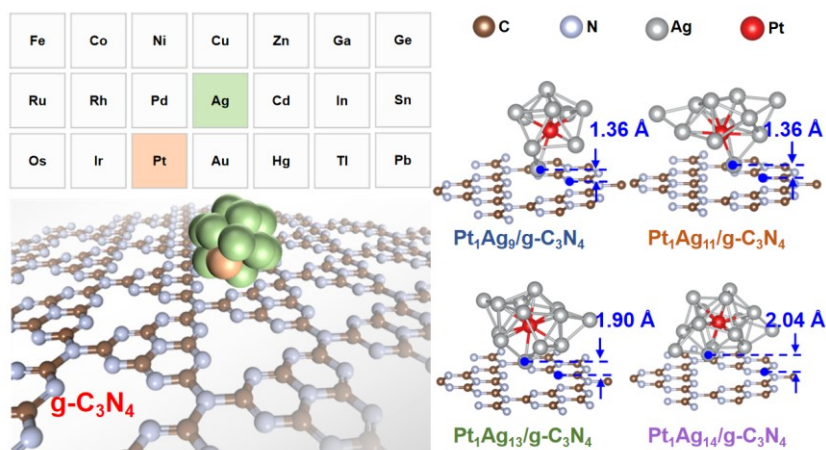

**Supplementary Figure 26.** Geometric mode for  $\text{Pt}_1\text{Ag}_x$  nanoclusters loaded on  $\text{g-C}_3\text{N}_4$  monolayer ( $x = 9, 11, 13$ , and  $14$ ).

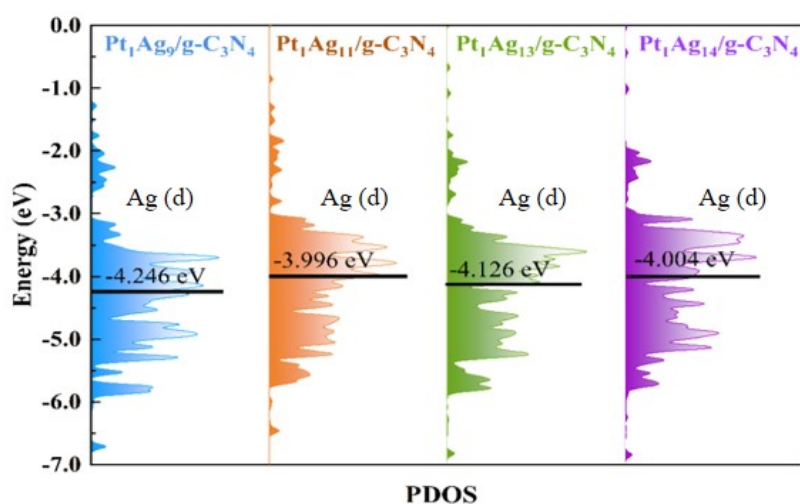

**Supplementary Figure 27.** The calculated partial densities of states (PDOS) for  $\text{Pt}_1\text{Ag}_x/\text{g-C}_3\text{N}_4$ . The d-band centers of Ag atoms of  $\text{Pt}_1\text{Ag}_x/\text{g-C}_3\text{N}_4$  are labeled ( $x = 9, 11, 13$  and  $14$ ). The Fermi level is set to zero.

**Supplementary Table 1.** Crystal data and structure refinement for the **Pt<sub>1</sub>Ag<sub>11</sub>**. The CCDC number of Pt<sub>1</sub>Ag<sub>11</sub>(SR)<sub>5</sub>[P(Ph-p-OMe)<sub>3</sub>]<sub>7</sub> is 2380779.

| Empirical formula                           | C179H156Ag11Cl4F20O21P7Pt5S                                    |
|---------------------------------------------|----------------------------------------------------------------|
| Formula weight                              | 9847.16                                                        |
| Temperature/K                               | 293(2)                                                         |
| Crystal system                              | triclinic                                                      |
| Space group                                 | <i>P</i> -1                                                    |
| a/Å                                         | 19.063(3)                                                      |
| b/Å                                         | 19.742(3)                                                      |
| c/Å                                         | 27.214(4)                                                      |
| α/°                                         | 79.311(12)                                                     |
| β/°                                         | 78.555(12)                                                     |
| γ/°                                         | 63.042(11)                                                     |
| Volume/Å <sup>3</sup>                       | 8894(2)                                                        |
| Z                                           | 2                                                              |
| ρ <sub>calc</sub> /cm <sup>3</sup>          | 1.839                                                          |
| μ/mm <sup>-1</sup>                          | 13.337                                                         |
| F(000)                                      | 4852.0                                                         |
| Radiation                                   | CuKα (λ= 1.54186)                                              |
| 2θ range for data collection/°              | 9.482 to 140.036                                               |
| Index ranges                                | -11 ≤ h ≤ 22, -18 ≤ k ≤ 23, -32 ≤ l ≤ 31                       |
| Reflections collected                       | 69196                                                          |
| Independent reflections                     | 31583 [R <sub>int</sub> = 0.0571, R <sub>sigma</sub> = 0.0651] |
| Data/restraints/parameters                  | 31583/2519/2194                                                |
| Goodness-of-fit on F <sup>2</sup>           | 1.033                                                          |
| Final R indexes [I ≥ 2σ (I)]                | R1 = 0.0695, wR2 = 0.1888                                      |
| Final R indexes [all data]                  | R1 = 0.0919, wR2 = 0.2059                                      |
| Largest diff. peak/hole / e Å <sup>-3</sup> | 1.73/-3.07                                                     |

**Supplementary Table 2.** The crystal system and space group of Pt<sub>1</sub>Ag<sub>x</sub> NCs (x = 9, 11, 13, and 14).

| Type/NC        | Pt <sub>1</sub> Ag <sub>9</sub> | Pt <sub>1</sub> Ag <sub>11</sub> | Pt <sub>1</sub> Ag <sub>13</sub> | Pt <sub>1</sub> Ag <sub>14</sub> |
|----------------|---------------------------------|----------------------------------|----------------------------------|----------------------------------|
| Crystal system | trigonal                        | triclinic                        | triclinic                        | monoclinic                       |
| Space group    | <i>R3</i>                       | <i>P-1</i>                       | <i>P-1</i>                       | <i>C2/c</i>                      |

**Supplementary Table 3.** The Bond length data for Pt<sub>1</sub>Ag<sub>9</sub> and Pt<sub>1</sub>Ag<sub>11</sub> NCs.

| Bond Length(Å) / NC | Pt <sub>1</sub> Ag <sub>9</sub> | Pt <sub>1</sub> Ag <sub>11</sub> |
|---------------------|---------------------------------|----------------------------------|
| Pt-Ag               | 2.7647(2)                       | 2.6946 2.7419                    |
|                     | 2.7646                          | 2.7256 2.7546                    |
|                     | 2.7441                          | 2.7481 2.7131                    |
|                     | 2.7442(2)                       | 2.7869 2.7493                    |
|                     | 2.7323(3)                       | 2.7687                           |
| Ag-Ag               |                                 | 2.8515 2.8557                    |
|                     |                                 | 2.8637 2.8803                    |
|                     | 2.9070(3)                       | 2.8071 2.8888                    |
|                     | 2.8192(3)                       | 2.8405 2.8796                    |
|                     | 2.8420(3)                       | 2.8278 2.7808                    |
|                     | 2.8227(3)                       | 2.9513 2.8532                    |
|                     | 2.9596(3)                       | 2.8608 2.8991                    |
|                     | 2.8888(3)                       | 2.8465 2.8824                    |
|                     |                                 | 2.8517 2.8762                    |
|                     |                                 | 2.5749 2.5554                    |
| Ag-S                | ~                               | 2.4418 2.4535                    |
|                     |                                 | 2.4651 2.4696                    |
|                     |                                 | 2.4530 2.6725                    |
|                     |                                 | 2.6067 2.6274                    |
| Ag-P                |                                 | 2.4338 2.4248                    |
|                     | 2.4273(3)                       | 2.4326 2.4852                    |
|                     | 2.4532(3)                       | 2.4929 2.4160                    |



**Supplementary Table 4.** Comparison of angles of Pt<sub>1</sub>Ag<sub>9</sub> and Pt<sub>1</sub>Ag<sub>11</sub> NCs.

| Angle(°) / NC | Pt <sub>1</sub> Ag <sub>9</sub> | Pt <sub>1</sub> Ag <sub>11</sub> |
|---------------|---------------------------------|----------------------------------|
| Ag1-Pt-Ag2    | 64.120                          | 63.231                           |
| Ag2-Pt-Ag3    | 61.965                          | 63.954                           |
| Ag3-Pt-Ag4    | 64.120                          | 61.782                           |
| Ag4-Pt-Ag5    | 61.965                          | 64.190                           |
| Ag5-Pt-Ag6    | 64.120                          | 62.906                           |
| Ag1-Pt-Ag6    | 61.965                          | 62.332                           |
| Ag1-Pt-Ag3    | 117.458                         | 119.793                          |
| Ag2-Pt-Ag4    | 116.401                         | 115.944                          |
| Ag3-Pt-Ag5    | 117.458                         | 116.654                          |
| Ag4-Pt-Ag6    | 116.401                         | 115.903                          |
| Ag1-Pt-Ag5    | 117.458                         | 116.565                          |
| Ag2-Pt-Ag6    | 116.401                         | 116.444                          |

**Supplementary Table 5.** The Ag and Pt contents in the composite catalysts.

| Entry | Sample                                                            | Ag content (*10 <sup>-3</sup> , wt%) | Pt content (*10 <sup>-3</sup> , wt%) |
|-------|-------------------------------------------------------------------|--------------------------------------|--------------------------------------|
| 1     | Pt <sub>1</sub> Ag <sub>9</sub> /g-C <sub>3</sub> N <sub>4</sub>  | 0.529                                | 0.276                                |
| 2     | Pt <sub>1</sub> Ag <sub>11</sub> /g-C <sub>3</sub> N <sub>4</sub> | 0.611                                | 0.277                                |
| 3     | Pt <sub>1</sub> Ag <sub>13</sub> /g-C <sub>3</sub> N <sub>4</sub> | 0.538                                | 0.268                                |
| 4     | Pt <sub>1</sub> Ag <sub>14</sub> /g-C <sub>3</sub> N <sub>4</sub> | 0.689                                | 0.298                                |

The metal content of nanocomposites can be calculated using the following equation:

$$M \text{ content} = c \cdot v / m; (M=\text{Ag or Pt})$$

Where *c* and *v* stand for the metal consistence and solution volume of ICP-AES testing, respectively; *m* is sample quality of Pt<sub>1</sub>Ag<sub>*x*</sub>/g-C<sub>3</sub>N<sub>4</sub> nanocomposites.

**Supplementary Table 6.** Visible-light photocatalytic hydrogen production activity comparison of a partial of metal clusters/MOF and metal NPs@MOF composites reported.

| Photocatalyst                                                     | Metal NCs/ NPs                           | Activity ( $\mu\text{mol g}^{-1} \text{ h}^{-1}$ ) | References                                                 |
|-------------------------------------------------------------------|------------------------------------------|----------------------------------------------------|------------------------------------------------------------|
| <b>Pt<sub>1</sub>Ag<sub>11</sub>/g-C<sub>3</sub>N<sub>4</sub></b> | <b>Pt<sub>1</sub>Ag<sub>11</sub> NCs</b> | <b>1780</b>                                        | <b>This work</b>                                           |
| Pt/Ce-TTCA                                                        | Pt NPs                                   | 348.8                                              | <i>Appl. Catal. B: Environ.</i> <b>2021</b> , 292, 120156. |
| Pt/ZSTU-3                                                         | Pt NPs                                   | 1350                                               | <i>J. Mater. Chem. A</i> <b>2019</b> , 7, 11928.           |
| Defect Pt@UiO-66-NH <sub>2</sub> -100                             | Pt NPs                                   | 381.2                                              | <i>Angew. Chem. Int. Ed.</i> <b>2019</b> , 58, 12175.      |
| Pt/NV-CN                                                          | Pt NCs                                   | 323.90                                             | <i>Sep. Purif. Technol.</i> <b>2024</b> , 330, 125393.     |
| Pt/MIL-125-NH <sub>2</sub> /(OH) <sub>2</sub>                     | Pt NPs                                   | 707                                                | <i>ACS Appl. Mater. Inter.</i> <b>2021</b> , 13, 5044.     |
| PtPd cubes @UiO-66-NH <sub>2</sub>                                | PtPd Cubes                               | 697                                                | <i>Adv. Sci.</i> <b>2021</b> , 8, 2004456.                 |
| CuNPs@d-NH <sub>2</sub> -MIL-125                                  | Cu NPs                                   | 1326.6                                             | <i>Chem. Commun.</i> <b>2023</b> , 59, 8456.               |
| PtNP-MNSs                                                         | Pt NPs                                   | 317                                                | <i>Angew. Chem. Int. Ed.</i> <b>2019</b> , 58, 10198.      |
| Ag <sub>25</sub> @UiO-66-NH <sub>2</sub>                          | Ag NCs                                   | 739.4                                              | <i>Angew. Chem. Int. Ed.</i> <b>2024</b> , e202401443.     |
| Pt/Cu-MIL-125-NH <sub>2</sub>                                     | Pt NPs                                   | 490                                                | <i>Angew. Chem. Int. Ed.</i> <b>2021</b> , 59, 17182.      |
| Pt-Fc@UiO-66-NH <sub>2</sub>                                      | Pt NPs                                   | 514.8                                              | <i>Angew. Chem. Int. Ed.</i> <b>2020</b> , 60,16372.       |
| Pt@TCPP(Mn)⊂DUT-52                                                | Pt NPs                                   | 1208                                               | <i>J. Mater. Chem. A</i> <b>2020</b> , 8, 12370.           |

**Supplementary Table 7.** Photocatalytic H<sub>2</sub> production of Pt<sub>1</sub>Ag<sub>x</sub>/g-C<sub>3</sub>N<sub>4</sub> (x = 9, 11, 13, and 14).

| <b>Materials /<br/>Hydrogen production (μmol·g<sup>-1</sup>·h<sup>-1</sup>)</b> | <b>0.5h</b> | <b>1h</b> | <b>1.5h</b> | <b>2h</b> | <b>2.5h</b> | <b>3h</b> |
|---------------------------------------------------------------------------------|-------------|-----------|-------------|-----------|-------------|-----------|
| <b>g-C<sub>3</sub>N<sub>4</sub></b>                                             | 50.5        | 54.6      | 54.3        | 54.6      | 53          | 52.9      |
| <b>Pt<sub>1</sub>Ag<sub>11</sub></b>                                            | 53.4        | 63.8      | 79.4        | 89.4      | 104.8       | 113.2     |
| <b>Pt<sub>1</sub>Ag<sub>9</sub>/g-C<sub>3</sub>N<sub>4</sub></b>                | 292.6       | 628.4     | 864.2       | 1115.2    | 1308.4      | 1577.4    |
| <b>Pt<sub>1</sub>Ag<sub>11</sub>/g-C<sub>3</sub>N<sub>4</sub></b>               | 876.2       | 1780      | 2798.2      | 3736.8    | 4769.4      | 5731.4    |
| <b>Pt<sub>1</sub>Ag<sub>13</sub>/g-C<sub>3</sub>N<sub>4</sub></b>               | 209.6       | 448       | 623         | 833.8     | 1050.4      | 1293.2    |
| <b>Pt<sub>1</sub>Ag<sub>14</sub>-1/g-C<sub>3</sub>N<sub>4</sub></b>             | 72.2        | 129.7     | 194.7       | 249.9     | 312.6       | 380.6     |
| <b>Pt<sub>1</sub>Ag<sub>14</sub>-2/g-C<sub>3</sub>N<sub>4</sub></b>             | 82.4        | 149.8     | 209.7       | 270.6     | 329.6       | 409.2     |
| <b>Pt<sub>1</sub>Ag<sub>14</sub>/g-C<sub>3</sub>N<sub>4</sub></b>               | 96.4        | 185.2     | 247.6       | 319.2     | 398         | 470.4     |

**Supplementary Table 8.** Parameters of AQE calculation.

| $\lambda$ (nm) | P (W·m <sup>-2</sup> ) | S (10 <sup>-4</sup> m <sup>2</sup> ) | v (μmol·h <sup>-1</sup> ) | v (10 <sup>-10</sup> mol·s <sup>-1</sup> ) | AQE (%) |
|----------------|------------------------|--------------------------------------|---------------------------|--------------------------------------------|---------|
| 360            | 157                    | 1                                    | 1.35                      | 3.75                                       | 1.59    |
| 380            | 176                    | 1                                    | 2.19                      | 6.08                                       | 2.18    |
| 400            | 206                    | 1                                    | 3.25                      | 9.03                                       | 2.62    |
| 420            | 181                    | 1                                    | 3.56                      | 9.88                                       | 3.11    |
| 440            | 163                    | 1                                    | 1.92                      | 5.33                                       | 1.78    |

\* The irradiation area was set at 1 cm<sup>2</sup>. The glass sealing surface of the reactor was covered with tin foil, and a 1 cm \* 1 cm small hole was opened in the center for light transmission.
